# Supplementary material for: A Multi-Point Identification Approach for the Recognition of Individual Leopards (Panthera pardus kotiya)
Source: MDPI journal article supplement (doi:10.3390/ani12050660), 2022-03-06
Supplement: s1 [file s1]

**Table S1:** Principal Component Analysis (PCA) Factor loads for every variable in the seven main clusters Eigen- values for the seven obtained components. The percentage of the variance explained by each axis is also indicated. Strong Interactions in the main three clusters are in bold.

|               | Prin1          | Prin2          | Prin3          | Prin4    | Prin5    | Prin6    | Prin7    | Prin8    |
|---------------|----------------|----------------|----------------|----------|----------|----------|----------|----------|
| LNS           | <b>0.2914</b>  | <b>0.26131</b> | 0.15393        | 0.29613  | -0.00776 | 0.06439  | -0.05826 | 0.06921  |
| LM1           | 0.11735        | 0.19983        | -0.51919       | -0.07557 | 0.18098  | 0.00953  | 0.33536  | 0.01248  |
| LM2           | 0.22842        | 0.14381        | -0.30789       | 0.17239  | 0.06118  | -0.12142 | -0.21923 | 0.0283   |
| LAM2          | 0.0725         | 0.02792        | 0.07946        | -0.11129 | -0.03783 | -0.11885 | 0.14384  | 0.88693  |
| LBM2          | 0.03681        | 0.01818        | 0.18168        | 0.10403  | 0.51882  | 0.07736  | -0.32926 | -0.0777  |
| RNS           | 0.20542        | <b>0.27855</b> | <b>0.27065</b> | 0.3865   | 0.07813  | 0.13338  | 0.08093  | 0.12319  |
| RM1           | 0.17101        | <b>0.27187</b> | -0.45569       | 0.09835  | 0.09523  | 0.11203  | 0.28582  | -0.15112 |
| RM2           | 0.19145        | <b>0.28375</b> | -0.12664       | 0.06468  | -0.23761 | 0.05953  | -0.43736 | 0.07552  |
| RAM2          | -0.04873       | -0.17568       | 0.14164        | 0.14981  | -0.30817 | -0.01366 | 0.35868  | -0.22703 |
| RBM2          | -0.01424       | -0.18603       | 0.1267         | 0.13129  | 0.60865  | 0.19808  | 0.12338  | -0.00448 |
| F1            | 0.15515        | <b>0.31515</b> | <b>0.27384</b> | -0.11069 | -0.28534 | 0.13453  | -0.06765 | -0.219   |
| F2            | 0.21566        | <b>0.26363</b> | <b>0.2228</b>  | -0.47157 | 0.15973  | 0.03599  | 0.03182  | -0.15989 |
| F3            | 0.04716        | <b>0.22291</b> | <b>0.29523</b> | 0.09196  | -0.01659 | 0.13249  | 0.50749  | 0.01594  |
| Leye          | <b>0.33624</b> | -0.2707        | 0.01733        | 0.27758  | 0.00464  | -0.32572 | 0.04045  | -0.01767 |
| LNeck         | <b>0.36412</b> | -0.18703       | 0.04408        | 0.10063  | -0.02303 | -0.40737 | 0.03212  | -0.13776 |
| LForeleg_Rank | <b>0.38116</b> | -0.0701        | 0.12744        | -0.28648 | 0.1045   | -0.37499 | 0.07526  | -0.07358 |
| Reye          | <b>0.26749</b> | -0.34297       | -0.05169       | 0.06338  | -0.12273 | 0.48976  | -0.09374 | 0.0656   |
| RNeck         | <b>0.31783</b> | -0.32759       | -0.07818       | 0.04364  | -0.14223 | 0.37847  | 0.05753  | 0.00464  |
| RForeleg_Rank | <b>0.30914</b> | -0.12599       | -0.02265       | -0.48218 | 0.04247  | 0.23428  | -0.00206 | 0.05902  |
| Eigenvalue    | 3.2663         | 2.0764         | 1.8625         | 1.3554   | 1.3146   | 1.2403   | 1.1453   | 1.0141   |
| Percent (%)   | 17.191         | 10.928         | 9.803          | 7.134    | 6.919    | 6.528    | 6.028    | 5.338    |
| Cum Percent   | 17.191         | 28.12          | 37.922         | 45.056   | 51.975   | 58.503   | 64.531   | 69.868   |
