# Supplementary material for: A Multi-Point Identification Approach for the Recognition of Individual Leopards (Panthera pardus kotiya)
Source: MDPI journal article supplement (doi:10.3390/ani12050660), 2022-03-06
Supplement: s1 [file s1]

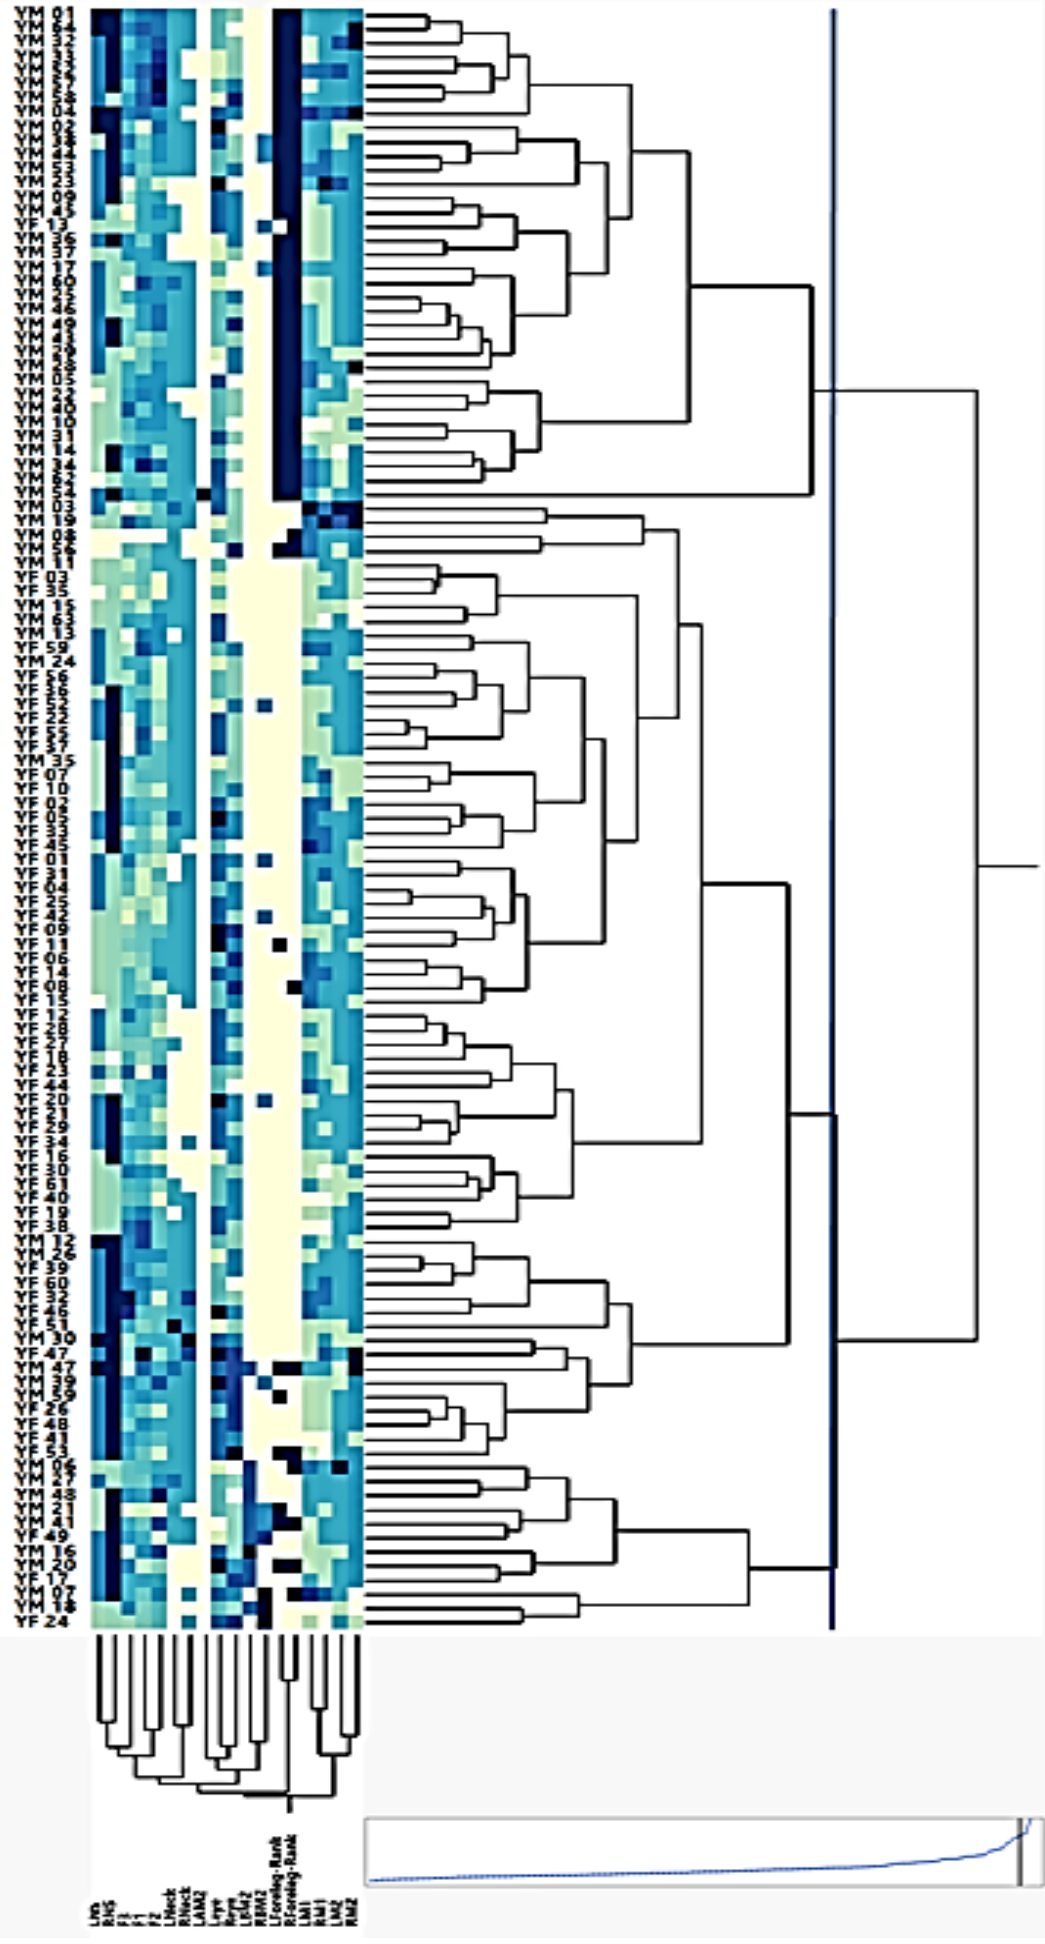

**Supplementary Figure S1** Cluster analysis of 126 male and female leopards in Yala National Park according to their 17 spot distribution at areas around mystacial, nasal, eye and foreleg
