# Supplementary material for: A Multi-Point Identification Approach for the Recognition of Individual Leopards (Panthera pardus kotiya)
Source: MDPI journal article supplement (doi:10.3390/ani12050660), 2022-03-06
Supplement: s1 [file s1]

Table S2: Data set for Injuries of Leopards -

| Obliterate changes (Completely dissapeared markings)     |           |                                       |                 |                                                                 |                              |
|----------------------------------------------------------|-----------|---------------------------------------|-----------------|-----------------------------------------------------------------|------------------------------|
| Method - Count                                           |           |                                       |                 |                                                                 |                              |
| ID Code                                                  | Injury No | Injury Area                           | Reference photo | Number of spots at Capture                                      | Number of spots at recapture |
| YM 16                                                    | D 1       | Near Muzzle (R)                       | 5 B             | 10                                                              | 0                            |
| YM 16                                                    | D 2       | Upper side of face (L)                | 5 C             | 4                                                               | 0                            |
| YM 01                                                    | U 2       | Under the eye ®                       | 6 B             | 7                                                               | 0                            |
| YM 01                                                    | U 4       | Forehead (F1)                         | 6 D             | 15                                                              | 7                            |
| YF 03                                                    | U 1       | Mystacial spots (L)                   | 6 E             | 2                                                               | 0                            |
| YM 07                                                    | U 1       | Forehead (F1)                         | 6 G             | 10                                                              | 4                            |
| YM 32                                                    | U 1       | Forehead (F1) (F2)                    | 6 H             | 15                                                              | 10                           |
| YM 3                                                     | U1        | Forehed F1                            |                 | 11                                                              | 7                            |
| YF 5                                                     | U1        | Forehead F1                           |                 | 15                                                              | 12                           |
| YM 2                                                     | U1        | Forehead (F1)                         |                 | 18                                                              | 9                            |
| YM 11                                                    | U1        | Forehead (F1)                         |                 | 14                                                              | 10                           |
| YM 53                                                    | U1        | Forehead (F1)                         |                 | 12                                                              | 10                           |
|                                                          |           |                                       |                 |                                                                 |                              |
| Rejig changes (Markings where the formation has changed) |           |                                       |                 |                                                                 |                              |
| Method - Presence absence survey                         |           |                                       |                 |                                                                 |                              |
| ID Code                                                  | Injury No | Injury Area                           | Reference photo | Rank of change in spot or rosette pattern formation at recaptur |                              |
| YM 07                                                    | D 1       | Below Mystacial area M2 (R)           | 5A              | 2                                                               |                              |
| YM 27                                                    | D 1       | Flank (L)                             | 5D              | 2                                                               |                              |
| YM 59                                                    | D 1       | Forehead (F2)                         | 5E              | 2                                                               |                              |
| YM 59                                                    | D 2       | Forehead (F3)                         | 5F              | 2                                                               |                              |
| YM 01                                                    | U 1       | Side of face (Right of Guide arch(R)) | 6A              | 1                                                               |                              |
| YM 01                                                    | U 3       | Mystacial area (R)                    | 6C              | 1                                                               |                              |
| YF 01                                                    | U 1       | Forehead (F1)                         | 6F              | 1                                                               |                              |
| YM 3                                                     | U2        | Forehead (F2 & F3)                    |                 | 2                                                               |                              |
| YF 3                                                     | U2        | Forehead (F1)                         |                 | 1                                                               |                              |
| YF 6                                                     | U1        | Forehead (F1)                         |                 | 1                                                               |                              |
| YF 20                                                    | U1        | Forehead (F1 & F3)                    |                 | 1                                                               |                              |
| YF 24                                                    | U1        | Forehead (F1)                         |                 | 1                                                               |                              |
| YM 53                                                    | U2        | Forehead (F2)                         |                 | 1                                                               |                              |
|                                                          |           |                                       |                 |                                                                 |                              |
| Ranking guide for Rejig changes                          |           |                                       |                 |                                                                 |                              |
| Rank 1 Prominance reduced                                |           |                                       |                 |                                                                 |                              |
| Rank 2 Prominence has reduced                            |           |                                       |                 |                                                                 |                              |
